# Supplementary material for: Effectiveness of direct patient outreach with a narrative naloxone and overdose prevention video to patients prescribed long-term opioid therapy in the USA: the Naloxone Navigator randomised clinical trial
Source: PubMed Central journal article supplement — BMJ Public Health. 2024 Jul 8;2(1):e000725. doi: 10.1136/bmjph-2023-000725 (PMC11485839; doi:10.1136/bmjph-2023-000725), 2024-07-08
Supplement: NIHMS2012919-supplement-Supplementary_material.pdf [file NIHMS2012919-supplement-Supplementary_material.pdf]

## Supplementary Online Content 1

The authors have provided this appendix to give readers additional information about their work.

Supplement to: Jason M. Glanz, PhD, Shane R. Mueller, PhD, Komal J. Narwaney, PhD, Nicole Wagner, PhD, Stan Xu, PhD, Courtney Kraus, MSPH, Kris Wain, MS, Sheila Botts, PharmD, Ingrid A Binswanger, MD, MPH  
Effectiveness of direct patient outreach with a narrative naloxone and overdose prevention video to patients prescribed long-term opioid therapy in the US: The Naloxone Navigator randomized clinical trial

### Table of Contents

|                                                                                                                                                                        |   |
|------------------------------------------------------------------------------------------------------------------------------------------------------------------------|---|
| eTable 1. Overdose Outcome .....                                                                                                                                       | 2 |
| eTable 2. Individual Responses to the Opioid-Related Behaviors in Treatment (ORBIT) Scale .....                                                                        | 3 |
| eTable 3. Opioid risk behavior* over time, by trial arm among study participants who completed the ORBIT measure at each survey time point.....                        | 4 |
| eTable 4. Opioid Overdose Prevention and Naloxone Knowledge over time, by trial arm among study participants who completed OOKS measure at each survey time point..... | 4 |
| eFigure 1: Participants who were Dispensed Naloxone over Time, by Trial Arm .....                                                                                      | 5 |
| eFigure 2: Opioid Overdose Prevention and Naloxone Knowledge over Time, by Trial Arm.....                                                                              | 6 |
| eTable 5. Drug Use and Hazardous Drinking Among Study Participants over Time, by Trial Arm.....                                                                        | 7 |

| <b>eTable 1. Overdose Outcome</b> | ICD-10 codes                                                                                                                                                                            |
|-----------------------------------|-----------------------------------------------------------------------------------------------------------------------------------------------------------------------------------------|
| Non-fatal opioid overdose         | T40.0X1, T40.0X2, T40.0X3, T40.0X4, T40.1X1, T40.1X2, T40.1X3, T40.1X4, T40.2X1, T40.2X2, T40.2X3, T40.2X4, T40.3X1, T40.3X2, T40.3X3, T40.3X4, T40.4X1, T40.4X2, T40.4X3, T40.4X4      |
| Fatal opioid overdose             | Underlying cause of death codes for drug poisoning (X40– X44, X60–X64, X85, Y10–Y14), and a contributing cause of death code indicating opioid involvement (T40.1, T40.2, T40.3, T40.4) |

| <b>eTable 2. Individual Responses to the Opioid-Related Behaviors in Treatment (ORBIT) Scale</b>                                                           |                                         |                               |                                 |                               |                                 |                               |
|------------------------------------------------------------------------------------------------------------------------------------------------------------|-----------------------------------------|-------------------------------|---------------------------------|-------------------------------|---------------------------------|-------------------------------|
| <b>ORBIT Question</b>                                                                                                                                      | <b>Proportion endorsing behavior at</b> |                               |                                 |                               |                                 |                               |
|                                                                                                                                                            | <b>Baseline</b>                         |                               | <b>4 months</b>                 |                               | <b>8 months</b>                 |                               |
| <b>In the past 4 months,</b>                                                                                                                               | <b>Intervention arm (n=514)</b>         | <b>Usual care arm (n=480)</b> | <b>Intervention arm (n=468)</b> | <b>Usual care arm n=(460)</b> | <b>Intervention arm (n=467)</b> | <b>Usual care arm (n=436)</b> |
| I have asked my doctor for an increase in my prescribed dose                                                                                               | 25.49                                   | 23.13                         | 18.38                           | 14.44                         | 16.27                           | 15.83                         |
| I have asked my doctor for an early renewal of my prescription because I had run out early                                                                 | 18.87                                   | 11.46                         | 12.82                           | 8.89                          | 9.42                            | 9.40                          |
| I have used another person's opioid medication, for example a friend or family member's medication, or bought it from the street                           | 7.59                                    | 5.21                          | 4.06                            | 3.33                          | 5.14                            | 4.36                          |
| I have saved up my opioid medication, just in case I needed it later                                                                                       | 30.16                                   | 25.42                         | 20.30                           | 16.44                         | 20.77                           | 16.51                         |
| I have gone to a different doctor to get more opioid medication and did not tell my normal doctor about it                                                 | 0.58                                    | 0.42                          | 0.85                            | 0.44                          | 0.43                            | 0.46                          |
| I have asked my doctor for another opioid prescription because either I had lost my prescription or medication, had it stolen, or someone else had used it | 1.75                                    | 1.88                          | 1.71                            | 1.33                          | 1.28                            | 1.83                          |
| I have given or sold my prescribed medication to someone else                                                                                              | 3.70                                    | 4.58                          | 2.99                            | 2.22                          | 2.14                            | 2.52                          |
| I have altered my dose in some other way, for example cutting patches or pills in half, when I was not advised to do so by a health professional           | 14.40                                   | 12.92                         | 9.83                            | 8.44                          | 9.21                            | 9.17                          |
| I have taken my opioid medication by a different route than was prescribed, for example by injecting it                                                    | 1.36                                    | 1.04                          | 0.85                            | 0.44                          | 0.64                            | 0.92                          |
| I have used my opioid medication for other purpose, for                                                                                                    | 13.04                                   | 13.13                         | 10.26                           | 9.11                          | 10.06                           | 6.88                          |

|                                                                                                                                                     |       |       |       |       |       |       |
|-----------------------------------------------------------------------------------------------------------------------------------------------------|-------|-------|-------|-------|-------|-------|
| example to help me sleep or to help with stress or worry (do not count the times when you took opioids at bedtime so that you would not be in pain) |       |       |       |       |       |       |
| Endorsed one or more opioid risk behaviors (any of the questions listed above)                                                                      | 59.53 | 51.46 | 43.38 | 39.11 | 43.04 | 37.84 |

**eTable 3. Opioid risk behavior\* over time, by trial arm among study participants who completed the ORBIT measure at each survey time point**

| Opioid risk behavior | No. of participants endorsing opioid risk behavior / no. who completed the survey measure (%) |                 | Adjusted risk ratio (95% CI)* | Time x intervention P value* |
|----------------------|-----------------------------------------------------------------------------------------------|-----------------|-------------------------------|------------------------------|
|                      | Intervention arm                                                                              | Usual care arm  |                               |                              |
| Baseline             | 306/514 (59.53)                                                                               | 247/480 (51.46) | 1.16 (1.03, 1.29)             | 0.93                         |
| 4 months             | 203/468 (43.38)                                                                               | 176/450 (39.11) | 1.12 (0.97, 1.31)             |                              |
| 8 months             | 201/467 (43.04)                                                                               | 165/436 (37.84) | 1.14 (0.97, 1.33)             |                              |

\*Opioid risk behavior was analyzed as a binary outcome, with a positive response defined as endorsing one or more risk behaviors on the ORBIT (Opioid-Related Behaviors in Treatment) scale

**eTable 4. Opioid Overdose Prevention and Naloxone Knowledge over time, by trial arm among study participants who completed OOKS measure at each survey time point**

| Rx-OOKS  | n, Rx-OOKS score*<br>Mean (95% CI) |                             | Difference (95% CI) | Time x intervention P value |
|----------|------------------------------------|-----------------------------|---------------------|-----------------------------|
|          | Intervention arm                   | Usual care arm              |                     |                             |
| Time 0   | n=505, 19.62 (19.24, 19.99)        | n=478, 11.46 (11.07, 11.84) | 8.11 (7.57, 8.65)   | <0.001                      |
| 4 months | n=472, 14.82 (14.43, 15.22)        | n=450, 13.18 (12.81, 13.56) | 1.61 (1.08, 2.14)   |                             |
| 8 months | n=468, 15.47(15.06, 15.87)         | n=437, 13.89 (13.51, 14.26) | 1.52 (0.98, 2.05)   |                             |

Abbreviations: Rx-OOKS – Prescription Opioid Overdose Knowledge Scale

\* Range of the Rx-OOKS scale is 0-25. Higher Rx-OOKS score represents greater knowledge

**eFigure 1: Participants who were Dispensed Naloxone over Time, by Trial Arm**

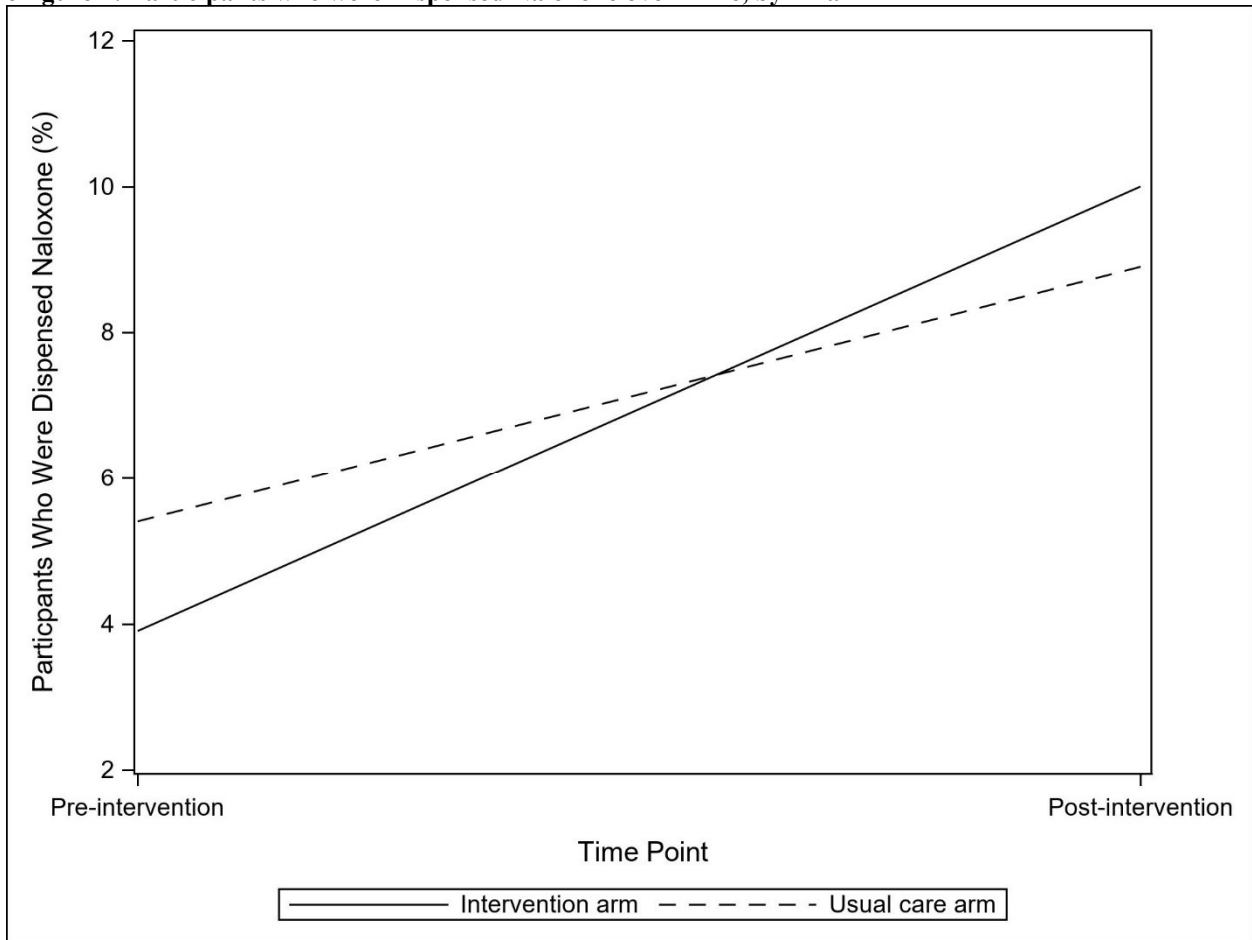

**Figure 2: Opioid Overdose Prevention and Naloxone Knowledge over Time, by Trial Arm**

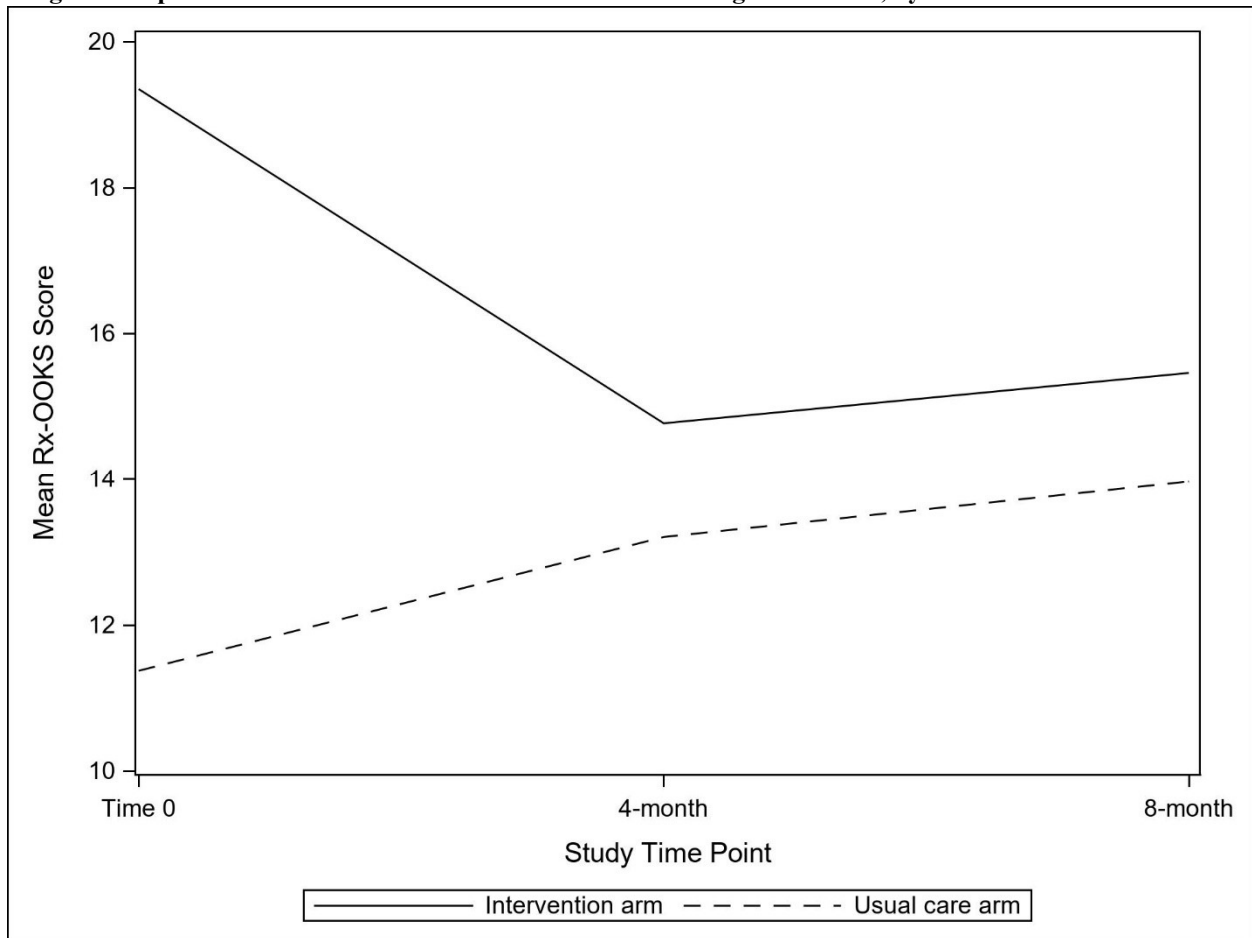

**eTable 5. Drug Use and Hazardous Drinking Among Study Participants over Time, by Trial Arm**

| Risk behavior             | Proportion endorsing risk behavior<br>(95% CI) |                           | Risk ratio<br>(95% CI) | Time x<br>intervention<br>P value |
|---------------------------|------------------------------------------------|---------------------------|------------------------|-----------------------------------|
|                           | Intervention arm<br>(n=519)                    | Usual care arm<br>(n=485) |                        |                                   |
| Cannabis use*             |                                                |                           |                        |                                   |
| Time 0                    | 28.0 (24.1, 31.9)                              | 24.4 (20.5, 28.2)         | 1.15 (0.93, 1.42)      | 0.31                              |
| 4 months                  | 25.6 (21.8, 29.4)                              | 25.2 (21.3, 29.1)         | 1.02 (0.82, 1.26)      |                                   |
| 8 months                  | 24.0 (20.3, 27.7)                              | 22.6 (18.8, 26.4)         | 1.06 (0.85, 1.33)      |                                   |
| Other drug use†,*         |                                                |                           |                        |                                   |
| Time 0                    | 2.5 (1.1, 3.8)                                 | 1.9 (0.6, 3.1)            | 1.32 (0.56, 3.13)      | 0.95                              |
| 4 months                  | 2.9 (1.4, 4.4)                                 | 2.3 (0.9, 3.7)            | 1.28 (0.58, 2.82)      |                                   |
| 8 months                  | 2.7 (1.2, 4.1)                                 | 2.3 (0.9, 3.7)            | 1.16 (0.52, 2.59)      |                                   |
| Non-medical sedative use* |                                                |                           |                        |                                   |
| Time 0                    | 19.8 (16.3, 23.2)                              | 19.1 (15.6, 22.6)         | 1.03 (0.80, 1.33)      | 0.52                              |
| 4 months                  | 19.0 (15.5, 22.5)                              | 17.9 (14.3, 21.4)         | 1.07 (0.81, 1.40)      |                                   |
| 8 months                  | 19.0 (15.6, 22.4)                              | 20.8 (17.0, 24.6)         | 0.91 (0.71, 1.18)      |                                   |
| Hazardous drinking‡       |                                                |                           |                        |                                   |
| Time 0                    | 16.4 (13.3, 19.7)                              | 15.7 (12.4, 19.0)         | 1.05 (0.79, 1.40)      | 0.96                              |
| 4 months                  | 15.4 (12.3, 18.6)                              | 14.4 (11.2, 17.6)         | 1.07 (0.79, 1.45)      |                                   |
| 8 months                  | 15.6 (12.4, 18.8)                              | 14.6 (11.4, 17.8)         | 1.07 (0.79, 1.44)      |                                   |

\*Assessed as binary outcomes, in which endorsement of one or more behavior was considered a positive response

†Other drug use includes heroin, other illicit opioids, cocaine, methamphetamine, inhalants, and hallucinogens

‡Assessed using the Alcohol Use Disorders Identification Test – Concise (AUDIT-C) which has a score range of 0-12. In men, a score of  $\geq 4$ , and in women, a score of  $\geq 3$  is positive; was analyzed as a binary outcome
